# Supplementary material for: First Phase 1 Double-Blind, Placebo-Controlled, Randomized Rectal Microbicide Trial Using UC781 Gel with a Novel Index of Ex Vivo Efficacy
Source: PLOS journal article supplement (doi:10.1371/journal.pone.0023243), 2011-09-28
Supplement: S1 (10.1371/journal.pone.0023243.s001) [file journal.pone.0023243.s001]

**Demographics Table S1**

| Characteristics                     | TOTAL (n=36)              |                            | PLACEBO (n=12)            |                         | UC781 0.1% (n=12)         |                            | UC781 0.25% (n=12)      |                           |
|-------------------------------------|---------------------------|----------------------------|---------------------------|-------------------------|---------------------------|----------------------------|-------------------------|---------------------------|
|                                     | Male                      | Female                     | Male                      | Female                  | Male                      | Female                     | Male                    | Female                    |
|                                     | n=26 (72%)                | n=10 (28%)                 | n=10 (83%)                | n=2 (17%)               | n=7 (58%)                 | n=5 (42%)                  | n=9 (75%)               | n=3 (25%)                 |
| <b>Age, years (median ± range)</b>  | <b>42</b> (24-63)         | <b>41.5</b> (25-64)        | <b>43</b> (24-52)         | <b>46</b> (25-64)       | <b>49</b> (29-63)         | <b>41</b> (25-51)          | <b>35</b> (26-53)       | <b>44</b> (29-44)         |
| <b>Weight, lbs (median ± range)</b> | <b>183.7</b><br>(116-312) | <b>166.1*</b><br>(117-379) | <b>190.2</b><br>(125-312) | <b>212</b><br>(166-258) | <b>167.2</b><br>(116-203) | <b>192.9*</b><br>(148-238) | <b>187</b><br>(132-260) | <b>136.5</b><br>(126-250) |
| <b>Race</b>                         |                           |                            |                           |                         |                           |                            |                         |                           |
| African-American                    | <b>11</b> (42%)           | <b>4</b> (40%)             | <b>3</b> (30%)            | <b>0</b>                | <b>2</b> (28%)            | <b>4</b> (80%)             | <b>6</b> (66.6%)        | <b>0</b>                  |
| Asian or Pacific Islander           | <b>1</b> (4%)             | <b>0</b>                   | <b>0</b>                  | <b>0</b>                | <b>1</b> (14%)            | <b>0</b>                   | <b>0</b>                | <b>0</b>                  |
| Native American                     | <b>1</b> (4%)             | <b>1</b> (10%)             | <b>0</b>                  | <b>0</b>                | <b>0</b>                  | <b>0</b>                   | <b>1</b> (11%)          | <b>1</b> (33.3%)          |
| White or European American          | <b>13</b> (50%)           | <b>5</b> (50%)             | <b>7</b> (70%)            | <b>2</b> (100%)         | <b>4</b> (57%)            | <b>1</b> (20%)             | <b>2</b> (22%)          | <b>2</b> (66.6%)          |
| <b>Ethnicity</b>                    |                           |                            |                           |                         |                           |                            |                         |                           |
| Hispanic or Latino                  | <b>4</b> (15%)            | <b>1</b> (10%)             | <b>1</b> (10%)            | <b>0</b>                | <b>2</b> (29%)            | <b>0</b>                   | <b>1</b> (11%)          | <b>1</b> (33.3%)          |
| Not Hispanic or Latino              | <b>21</b> (81%)           | <b>8</b> (80%)             | <b>8</b> (80%)            | <b>2</b> (100%)         | <b>5</b> (71%)            | <b>4</b> (80%)             | <b>8</b> (89%)          | <b>2</b> (66.6%)          |
| Prefer not to answer                | <b>1</b> (4%)             | <b>1</b> (10%)             | <b>1</b> (10%)            | <b>0</b>                | <b>0</b>                  | <b>1</b> (20%)             | <b>0</b>                | <b>0</b>                  |
| <b>Education, years</b>             |                           |                            |                           |                         |                           |                            |                         |                           |
| Less than 12                        | <b>4</b> (15%)            | <b>3</b> (30%)             | <b>1</b> (10%)            | <b>0</b>                | <b>1</b> (14%)            | <b>2</b> (40%)             | <b>2</b> (22%)          | <b>1</b> (33.3%)          |
| 12 - 16                             | <b>18</b> (69%)           | <b>5</b> (50%)             | <b>7</b> (70%)            | <b>1</b> (50%)          | <b>4</b> (57%)            | <b>2</b> (40%)             | <b>7</b> (78%)          | <b>2</b> (66.6%)          |
| More than 16                        | <b>4</b> (15%)            | <b>1</b> (10%)             | <b>2</b> (20%)            | <b>1</b> (50%)          | <b>2</b> (28%)            | <b>0</b>                   | <b>0</b>                | <b>0</b>                  |
| Prefer not to answer                | <b>0</b>                  | <b>1</b> (10%)             | <b>2</b> (20%)            | <b>0</b>                | <b>0</b>                  | <b>1</b> (20%)             | <b>0</b>                | <b>0</b>                  |
| <b>Income (from previous year)</b>  |                           |                            |                           |                         |                           |                            |                         |                           |
| \$10,000 or less                    | <b>8</b> (31%)            | <b>4</b> (40%)             | <b>3</b> (30%)            | <b>0</b>                | <b>2</b> (28%)            | <b>3</b> (60%)             | <b>3</b> (33.3%)        | <b>1</b> (33.3%)          |
| \$10,001 to \$20,000                | <b>8</b> (31%)            | <b>2</b> (20%)             | <b>2</b> (20%)            | <b>0</b>                | <b>4</b> (57%)            | <b>1</b> (20%)             | <b>2</b> (22%)          | <b>1</b> (33.3%)          |
| \$20,001 to \$40,000                | <b>3</b> (11%)            | <b>1</b> (10%)             | <b>1</b> (10%)            | <b>1</b> (50%)          | <b>0</b>                  | <b>0</b>                   | <b>2</b> (22%)          | <b>0</b>                  |
| \$40,001 to \$60,000                | <b>3</b> (11%)            | <b>0</b>                   | <b>2</b> (20%)            | <b>0</b>                | <b>1</b> (14%)            | <b>0</b>                   | <b>0</b>                | <b>0</b>                  |
| Over \$80,000                       | <b>1</b> (4%)             | <b>0</b>                   | <b>1</b> (10%)            | <b>0</b>                | <b>0</b>                  | <b>0</b>                   | <b>0</b>                | <b>0</b>                  |
| Don't Know                          | <b>1</b> (4%)             | <b>1</b> (10%)             | <b>0</b>                  | <b>1</b> (50%)          | <b>0</b>                  | <b>0</b>                   | <b>1</b> (11%)          | <b>0</b>                  |
| Prefer not to Answer                | <b>2</b> (8%)             | <b>2</b> (20%)             | <b>1</b> (10%)            | <b>0</b>                | <b>0</b>                  | <b>1</b> (20%)             | <b>1</b> (11%)          | <b>1</b> (33.3%)          |

\* one female participant was not weighed at baseline
