# Supplementary material for: First Phase 1 Double-Blind, Placebo-Controlled, Randomized Rectal Microbicide Trial Using UC781 Gel with a Novel Index of Ex Vivo Efficacy
Source: PLOS journal article supplement (doi:10.1371/journal.pone.0023243), 2011-09-28
Supplement: S2 (10.1371/journal.pone.0023243.s002) [file journal.pone.0023243.s002]

**Table S2: Gastrointestinal-Related Adverse Events (AE) in Enrolled Participants per Subject Number, Group and Trial Stage**

| Adverse Events (AEs)<br>(n=36)             | Subjects<br>(total) | AEs<br>(total)                     | Single Dose Exposure       |                             |                            |                             |                            |                             | 7-Day Exposure             |                             |                            |                             |                            |                             |
|--------------------------------------------|---------------------|------------------------------------|----------------------------|-----------------------------|----------------------------|-----------------------------|----------------------------|-----------------------------|----------------------------|-----------------------------|----------------------------|-----------------------------|----------------------------|-----------------------------|
|                                            | (n=36)<br>(%)       | N / Total AEs<br>(n=# of subjects) | Placebo                    |                             | UC781: 0.1%                |                             | UC781: 0.25%               |                             | Placebo                    |                             | UC781: 0.1%                |                             | UC781: 0.25%               |                             |
|                                            |                     |                                    | # of subjects<br>(n=12)(%) | # of AEs<br>(# of subjects) | # of subjects<br>(n=12)(%) | # of AEs<br>(# of subjects) | # of subjects<br>(n=12)(%) | # of AEs<br>(# of subjects) | # of subjects<br>(n=12)(%) | # of AEs<br>(# of subjects) | # of subjects<br>(n=12)(%) | # of AEs<br>(# of subjects) | # of subjects<br>(n=12)(%) | # of AEs<br>(# of subjects) |
| <b>Subjects with<br/>No AEs Reported**</b> | <b>7/36 (19%)</b>   | <b>NA</b>                          |                            |                             |                            |                             |                            |                             |                            |                             |                            |                             |                            |                             |
| <b>AE: Grade 1</b>                         | <b>15/36 (42%)</b>  | <b>28 (15 subjects)</b>            | <b>2 (17%)</b>             | <b>9 (2 subjects)</b>       | <b>4(33%)</b>              | <b>5 (4 subjects)</b>       | <b>4 (33%)</b>             | <b>5 (4 subjects)</b>       | <b>2 (17%)</b>             | <b>4 (2 subjects)</b>       | <b>1 (8%)</b>              | <b>1 (1 subject)</b>        | <b>4 (33%)</b>             | <b>4 (4 subjects)</b>       |
| ⇒ <i>Related to Product</i>                | <b>1/36 (3%)</b>    | <b>2 (1 subject)</b>               | <b>1 (8%)</b>              | <b>2(1 subject)</b>         | <b>0</b>                   | <b>0</b>                    | <b>0</b>                   | <b>0</b>                    | <b>0</b>                   | <b>0</b>                    | <b>0</b>                   | <b>0</b>                    | <b>0</b>                   | <b>0</b>                    |
| →GI                                        | <b>1/36 (3%)</b>    | <b>2 (1 subject)</b>               | <b>1(8%)</b>               | <b>2 (1 subject)</b>        | <b>0</b>                   | <b>0</b>                    | <b>0</b>                   | <b>0</b>                    | <b>0</b>                   | <b>0</b>                    | <b>0</b>                   | <b>0</b>                    | <b>0</b>                   | <b>0</b>                    |
| Hematochezia                               | 1/36 (3%)           | 1 (1 subject)                      | 1 (8%)                     | 1 (1 subject)               | 0                          | 0                           | 0                          | 0                           | 0                          | 0                           | 0                          | 0                           | 0                          | 0                           |
| Tenderness                                 | 1/36 (3%)           | 1 (1 subject)                      | 1 (8%)                     | 1 (1 subject)               | 0                          | 0                           | 0                          | 0                           | 0                          | 0                           | 0                          | 0                           | 0                          | 0                           |
| →non-GI                                    | 0                   | 0                                  | 0                          | 0                           | 0                          | 0                           | 0                          | 0                           | 0                          | 0                           | 0                          | 0                           | 0                          | 0                           |
| ⇒ <i>Possibly Related to Product</i>       | <b>3/36 (8%)</b>    | <b>6 (3 subjects)</b>              | <b>1 (8%)</b>              | <b>3 (1 subject)</b>        | <b>1 (8%)</b>              | <b>1 (1 subject)</b>        | <b>0</b>                   | <b>0</b>                    | <b>1 (8%)</b>              | <b>1 (1 subject)</b>        | <b>0</b>                   | <b>0</b>                    | <b>1(8%)</b>               | <b>1 (1 subject)</b>        |
| →GI                                        | <b>2/36 (6%)</b>    | <b>2 (2 subjects)</b>              | <b>1 (8%)</b>              | <b>1 (1 subject)</b>        | <b>1 (8%)</b>              | <b>1 (1 subject)</b>        | <b>0</b>                   | <b>0</b>                    | <b>0</b>                   | <b>0</b>                    | <b>0</b>                   | <b>0</b>                    | <b>0</b>                   | <b>0</b>                    |
| Pain w/defecation                          | 1/36 (3%)           | 1 (1 subject)                      | 1 (8%)                     | 1 (1 subject)               | 0                          | 0                           | 0                          | 0                           | 0                          | 0                           | 0                          | 0                           | 0                          | 0                           |
| Throbbing - rectum                         | 1/36 (3%)           | 1 (1 subject)                      | 0                          | 0                           | 1 (8%)                     | 1 (1 subject)               | 0                          | 0                           | 0                          | 0                           | 0                          | 0                           | 0                          | 0                           |
| →non-GI                                    | <b>1/36 (3%)</b>    | <b>4 (2 subjects)</b>              | <b>1 (8%)</b>              | <b>2 (1 subject)</b>        | <b>0</b>                   | <b>0</b>                    | <b>0</b>                   | <b>0</b>                    | <b>1 (8%)</b>              | <b>1 (1 subject)</b>        | <b>0</b>                   | <b>0</b>                    | <b>1 (8%)</b>              | <b>1 (1 subject)</b>        |
| ⇒ <i>Probably Related to Product</i>       | <b>1/36 (3%)</b>    | <b>1 (1 subject)</b>               | <b>0</b>                   | <b>0</b>                    | <b>1 (8%)</b>              | <b>1 (1 subject)</b>        | <b>0</b>                   | <b>0</b>                    | <b>0</b>                   | <b>0</b>                    | <b>0</b>                   | <b>0</b>                    | <b>0</b>                   | <b>0</b>                    |
| →GI                                        | <b>1/36 (3%)</b>    | <b>1 (1 subject)</b>               | <b>0</b>                   | <b>0</b>                    | <b>1 (8%)</b>              | <b>1 (1 subject)</b>        | <b>0</b>                   | <b>0</b>                    | <b>0</b>                   | <b>0</b>                    | <b>0</b>                   | <b>0</b>                    | <b>0</b>                   | <b>0</b>                    |
| Bloating                                   | 1/36 (3%)           | 1 (1 subject)                      | 0                          | 0                           | 1(8%)                      | 1 (1 subject)               | 0                          | 0                           | 0                          | 0                           | 0                          | 0                           | 0                          | 0                           |
| →non-GI                                    | <b>0</b>            | <b>0</b>                           | <b>0</b>                   | <b>0</b>                    | <b>0</b>                   | <b>0</b>                    | <b>0</b>                   | <b>0</b>                    | <b>0</b>                   | <b>0</b>                    | <b>0</b>                   | <b>0</b>                    | <b>0</b>                   | <b>0</b>                    |
| ⇒ <i>Not related to Product</i>            | <b>13/36 (36%)</b>  | <b>19 (13 subjects)</b>            | <b>2 (17%)</b>             | <b>4 (2 subjects)</b>       | <b>3 (25%)</b>             | <b>3 (3 subjects)</b>       | <b>4 (33%)</b>             | <b>5 (4 subjects)</b>       | <b>2 (17%)</b>             | <b>3 (2 subjects)</b>       | <b>1 (8%)</b>              | <b>1 (1 subject)</b>        | <b>3 (25%)</b>             | <b>3 (3 subjects)</b>       |
| →GI                                        | <b>3/36 (8%)</b>    | <b>5 (3 subjects)</b>              | <b>1 (8%)</b>              | <b>2 (1 subject)</b>        | <b>0</b>                   | <b>0</b>                    | <b>1 (8%)</b>              | <b>2 (1 subject)</b>        | <b>0</b>                   | <b>0</b>                    | <b>1 (8%)</b>              | <b>1 (1 subject)</b>        | <b>0</b>                   | <b>0</b>                    |
| Acid reflux                                | 1/36 (3%)           | 1 (1 subject)                      | 1 (8%)                     | 1 (1 subject)               | 0                          | 0                           | 0                          | 0                           | 0                          | 0                           | 0                          | 0                           | 0                          | 0                           |
| Cramping                                   | 1/36 (3%)           | 1 (1 subject)                      | 0                          | 0                           | 0                          | 0                           | 1(8%)                      | 1 (1 subject)               | 0                          | 0                           | 0                          | 0                           | 0                          | 0                           |
| Diarrhea                                   | 1/36 (3%)           | 1 (1 subject)                      | 0                          | 0                           | 0                          | 0                           | 1(8%)                      | 1 (1 subject)               | 0                          | 0                           | 0                          | 0                           | 0                          | 0                           |
| Eructation                                 | 1/36 (3%)           | 1 (1 subject)                      | 1 (8%)                     | 1 (1 subject)               | 0                          | 0                           | 0                          | 0                           | 0                          | 0                           | 0                          | 0                           | 0                          | 0                           |
| Polyps - Colon                             | 1/36 (3%)           | 1 (1 subject)                      | 0                          | 0                           | 0                          | 0                           | 0                          | 0                           | 0                          | 0                           | 1(8%)                      | 1 (1 subject)               | 0                          | 0                           |
| →non-GI                                    | <b>12/36 (33%)</b>  | <b>14 (12 subjects)</b>            | <b>2 (17%)</b>             | <b>2 (1 subject)</b>        | <b>3 (25%)</b>             | <b>3 (3 subjects)</b>       | <b>3 (25%)</b>             | <b>3 (3 subjects)</b>       | <b>2 (17%)</b>             | <b>3 (2 subjects)</b>       | <b>0</b>                   | <b>0</b>                    | <b>3 (25%)</b>             | <b>3 (3 subjects)</b>       |
| <b>AE: Grade 2</b>                         | <b>5/36 (14%)</b>   | <b>8 (5 subjects)</b>              | <b>1 (8%)</b>              | <b>4 (1 subject)</b>        | <b>0</b>                   | <b>0</b>                    | <b>1 (8%)</b>              | <b>1 (1 subject)</b>        | <b>1 (8%)</b>              | <b>1 (1 subject)</b>        | <b>1 (8%)</b>              | <b>1 (1 subject)</b>        | <b>1 (8%)</b>              | <b>1 (1 subject)</b>        |
| ⇒ <i>Possibly Related to Product</i>       | <b>3/36 (8%)</b>    | <b>6 (3 subjects)</b>              | <b>1 (8%)</b>              | <b>4 (1 subject)</b>        | <b>0</b>                   | <b>0</b>                    | <b>1 (8%)</b>              | <b>1 (1 subject)</b>        | <b>0</b>                   | <b>0</b>                    | <b>1 (8%)</b>              | <b>1 (1 subject)</b>        | <b>0</b>                   | <b>0</b>                    |
| →GI                                        | <b>3/36 (8%)</b>    | <b>5 (3 subjects)</b>              | <b>1 (8%)</b>              | <b>3 (1 subject)</b>        | <b>0</b>                   | <b>0</b>                    | <b>1 (8%)</b>              | <b>1 (1 subject)</b>        | <b>0</b>                   | <b>0</b>                    | <b>1 (8%)</b>              | <b>1 (1 subject)</b>        | <b>0</b>                   | <b>0</b>                    |
| Cramping                                   | 1/36 (3%)           | 1 (1 subject)                      | 1(8%)                      | 1 (1 subject)               | 0                          | 0                           | 0                          | 0                           | 0                          | 0                           | 0                          | 0                           | 0                          | 0                           |
| Diarrhea                                   | 3/36 (8%)           | 3 (3 subjects)                     | 1 (8%)                     | 1 (1 subject)               | 0                          | 0                           | 1(8%)                      | 1 (1 subject)               | 0                          | 0                           | 1 (8%)                     | 1 (1 subject)               | 0                          | 0                           |
| Flatulence                                 | 1/36 (3%)           | 1 (1 subject)                      | 1 (8%)                     | 1 (1 subject)               | 0                          | 0                           | 0                          | 0                           | 0                          | 0                           | 0                          | 0                           | 0                          | 0                           |
| →non-GI                                    | <b>1/36 (3%)</b>    | <b>1 (1 subject)</b>               | <b>1 (8%)</b>              | <b>1 (1 subject)</b>        | <b>0</b>                   | <b>0</b>                    | <b>0</b>                   | <b>0</b>                    | <b>0</b>                   | <b>0</b>                    | <b>0</b>                   | <b>0</b>                    | <b>0</b>                   | <b>0</b>                    |
| ⇒ <i>Not related to Product</i>            | <b>2/36 (6%)</b>    | <b>2 (2 subjects)</b>              | <b>0</b>                   | <b>0</b>                    | <b>0</b>                   | <b>0</b>                    | <b>0</b>                   | <b>0</b>                    | <b>1 (8%)</b>              | <b>1 (1 subject)</b>        | <b>0</b>                   | <b>0</b>                    | <b>1 (8%)</b>              | <b>1 (1 subject)</b>        |
| →GI                                        | <b>0</b>            | <b>0</b>                           | <b>0</b>                   | <b>0</b>                    | <b>0</b>                   | <b>0</b>                    | <b>0</b>                   | <b>0</b>                    | <b>0</b>                   | <b>0</b>                    | <b>0</b>                   | <b>0</b>                    | <b>0</b>                   | <b>0</b>                    |
| →non-GI                                    | <b>2/36 (6%)</b>    | <b>2 (2 subjects)</b>              | <b>0</b>                   | <b>0</b>                    | <b>0</b>                   | <b>0</b>                    | <b>0</b>                   | <b>0</b>                    | <b>1 (8%)</b>              | <b>1 (1 subject)</b>        | <b>0</b>                   | <b>0</b>                    | <b>1 (8%)</b>              | <b>1 (1 subject)</b>        |
| <b>AE: Grade 3</b>                         | <b>0</b>            | <b>0</b>                           | <b>0</b>                   | <b>0</b>                    | <b>0</b>                   | <b>0</b>                    | <b>0</b>                   | <b>0</b>                    | <b>0</b>                   | <b>0</b>                    | <b>0</b>                   | <b>0</b>                    | <b>0</b>                   | <b>0</b>                    |
| <i>None reported</i>                       | 0                   | 0                                  | 0                          | 0                           | 0                          | 0                           | 0                          | 0                           | 0                          | 0                           | 0                          | 0                           | 0                          | 0                           |
| <b>AE: Grade 4</b>                         | <b>0</b>            | <b>0</b>                           | <b>0</b>                   | <b>0</b>                    | <b>0</b>                   | <b>0</b>                    | <b>0</b>                   | <b>0</b>                    | <b>0</b>                   | <b>0</b>                    | <b>0</b>                   | <b>0</b>                    | <b>0</b>                   | <b>0</b>                    |
| <i>None reported</i>                       | 0                   | 0                                  | 0                          | 0                           | 0                          | 0                           | 0                          | 0                           | 0                          | 0                           | 0                          | 0                           | 0                          | 0                           |

\* gastrointestinal
